# Supplementary material
Source: PubMed Central journal article supplement (PMC2154408)

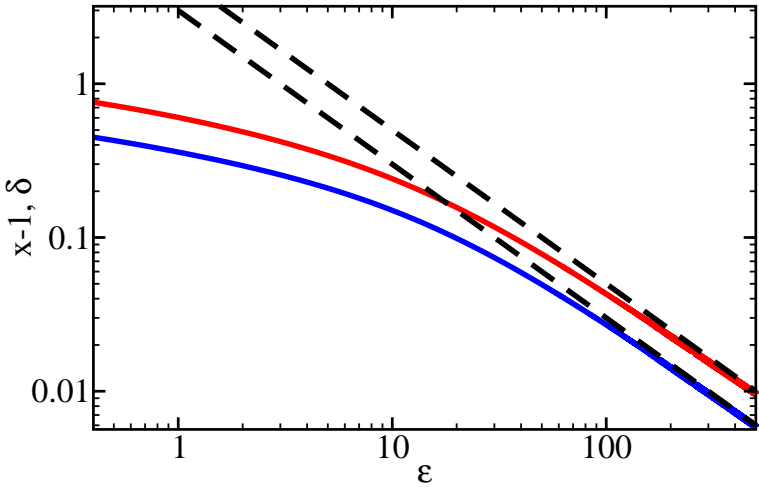

Supplement: supp_0705513104_05513Fig10.pdf [file supp_0705513104_05513Fig10.pdf]

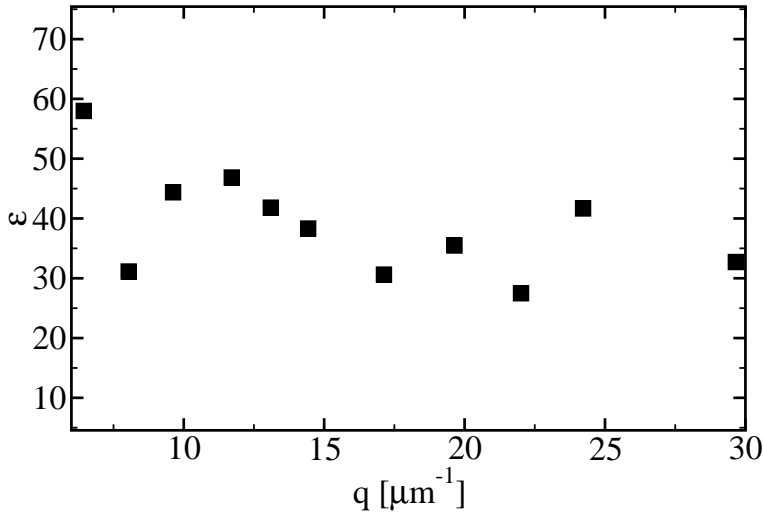

Supplement: supp_0705513104_05513Fig7.pdf [file supp_0705513104_05513Fig7.pdf]

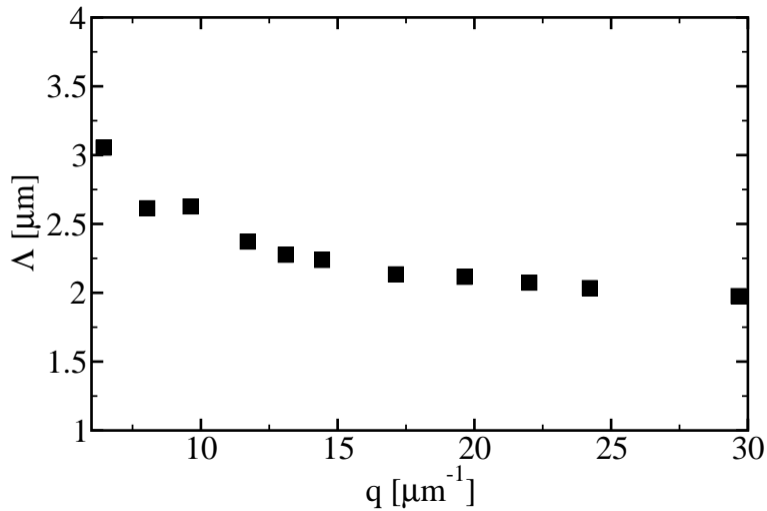

Supplement: supp_0705513104_05513Fig8.pdf [file supp_0705513104_05513Fig8.pdf]

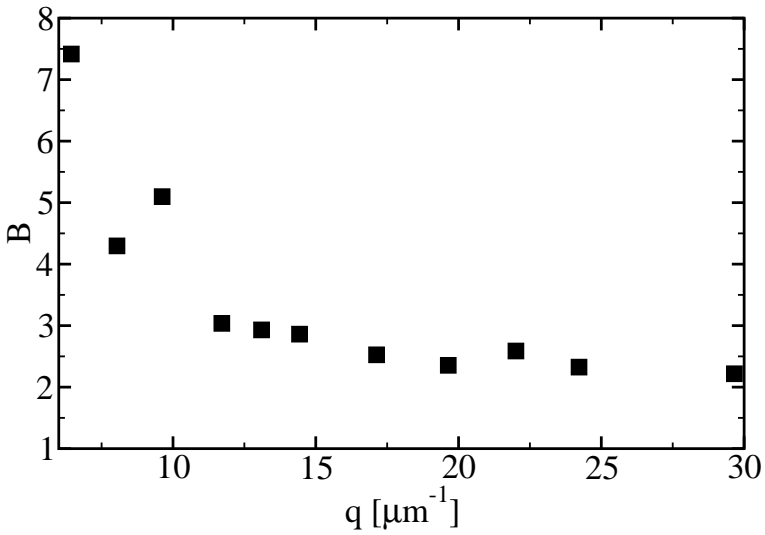

Supplement: supp_0705513104_05513Fig9.pdf [file supp_0705513104_05513Fig9.pdf]
